# Supplementary material for: Application of hierarchical oligonucleotide primer extension (HOPE) to assess relative abundances of ammonia- and nitrite-oxidizing bacteria
Source: PubMed Central journal article supplement (PMC5381152; doi:10.1186/s12866-017-0998-2), 2017-04-04
Supplement: 12866_2017_998_MOESM1_ESM.pdf [file 12866_2017_998_MOESM1_ESM.pdf]

Root (5089/3333501); Bacteria (5089/3070243); Nitrospirae (4451/8171); "Nitrospira" (4451/8171); "Nitrospirales" (4451/8171); "Nitrospiraceae" (4451/8171)

## Hierarchy View:

▼ genus Nitrospira (2358/5378) (hits/total searched) [list results for this node]

S000000821 Nitrospira sp.; AJ224042  
 S000001332 Nitrospira sp.; Y14640  
 S000004359 Nitrospira sp.; Y14642  
 S000005124 Nitrospira moscoviensis (T); X82558  
 S000006640 Nitrospira sp.; Y14636  
 S000007351 Nitrospira sp.; Y14641  
 S000008534 Nitrospira sp.; AJ224041  
 S000009675 Nitrospira sp.; Y14644  
 S000010052 Nitrospira sp.; Y14637  
 S000010421 Nitrospira sp.; AJ224038  
 S000010844 Nitrospira sp.; Y14638  
 S000012390 Nitrospira sp.; AJ224039  
 S000015738 Nitrospira sp.; Y14643  
 S000016078 Nitrospira sp.; AJ224040  
 S000021615 Nitrospira sp.; Y14639  
 S000024494 Nitrospira sp.; AJ224044  
 S000024499 Nitrospira sp.; AJ224043  
 S000024623 Nitrospira sp.; AJ224045  
 S000024748 Nitrospira sp.; AJ224046  
 S000025371 uncultured bacterium 1405-19; AJ007652  
 S000040958 rhizosphere soil bacterium RSC-II-52; AJ252684  
 S000100950 uncultured Nitrospira sp.; JG37-AG-131; AJ519405  
 S000102350 uncultured bacterium; JG37-AG-70; AJ519620  
 S000106404 uncultured Nitrospirae bacterium; JG36-TzT-13; AJ534638  
 S000130382 uncultured bacterium; C4-K18; AJ421207  
 S000131017 uncultured bacterium; C3-K5; AJ421201  
 S000144745 uncultured Nitrospira sp.; JG36-G5-2; AJ582041  
 S000249705 uncultured bacterium; EA1B1; AY186068  
 S000261709 uncultured soil bacterium; 605; AY493909  
 S000273128 uncultured bacterium; 1013-28-CG51; AY532586  
 S000273576 uncultured bacterium; 1013-28-CG50; AY532585  
 S000331342 uncultured bacterium; Kazan-1B-07/BC19-1B-07; AY592084  
 S000336675 uncultured bacterium A-11; AF033558  
 S000336676 uncultured bacterium A-4; AF033559  
 S000338023 uncultured soil bacterium S004; AF128670  
 S000338082 uncultured soil bacterium C059; AF128729  
 S000341118 uncultured Green Bay ferromanganous micronodule bacterium MNC2; AF293010  
 \* S000341119 uncultured Green Bay ferromanganous micronodule bacterium MNB2; AF293011  
 \* S000341120 uncultured Green Bay ferromanganous micronodule bacterium MNB8; AF293012  
 \* S000341121 uncultured Green Bay ferromanganous micronodule bacterium MNA3; AF293013  
 S000341501 uncultured bacterium PHOS-HE34; AF314422  
 S000341784 unidentified bacterium wb1\_D06; AF317756  
 S000341786 unidentified bacterium wb1\_C02; AF317758  
 S000341792 unidentified bacterium wb1\_F07; AF317764  
 S000345624 uncultured bacterium; G19; AF407702  
 \* S000351038 uncultured bacterium; JCL9-22; AF499363  
 \* S000351107 uncultured bacterium; BL-59; AF499432  
 S000351613 uncultured bacterium; C6-K31; AJ421160  
 S000357855 uncultured bacterium; DSSD16; AY328715  
 S000357883 uncultured bacterium; DSSD45; AY328743  
 S000357900 uncultured bacterium; DSSD62; AY328760  
 S000366366 uncultured Nitrospirae bacterium; DGGE gel band ESR BR 14; AF540049  
 S000366371 uncultured Nitrospirae bacterium; DGGE gel band ESR BR 19; AF540054  
 S000388268 Nitrospira cf. moscoviensis SBR1015; AF155152  
 S000388269 Nitrospira cf. moscoviensis SBR1024; AF155153  
 S000388270 Nitrospira cf. moscoviensis SBR2016; AF155154  
 S000388271 Nitrospira cf. moscoviensis SBR2046; AF155155  
 \* S000397830 uncultured Nitrospirae bacterium; DGGE band RWA12; AY145869  
 S000397857 Nitrospirales bacterium K21; AY146671  
 S000398160 uncultured Nitrospira sp.; WYO26C; AY150907  
 S000425892 uncultured Nitrospira sp.; AY741094  
 S000427926 Nitrospira sp.; AF035813  
 S000471701 uncultured bacterium; D023010; AJ617918  
 S000471702 uncultured bacterium; D14423; AJ617919  
 S000471703 uncultured bacterium; D023011; AJ617920  
 S000476573 uncultured Nitrospira sp.; BDC1\_F10; AY689544  
 S000476652 uncultured Nitrospira sp.; BDC35G06; AY689623

## Lineage (click node to return it to hierarchy view):

Root (1849/3333501); Bacteria (1849/3070243); Nitrospirae (1835/8171); "Nitrospira" (1835/8171); "Nitrospirales" (1835/8171); "Nitrospiraceae" (1835/8171)

## Hierarchy View:

▼ genus Nitrospira (1835/5378) (hits/total searched) [list results for this node]

S000000821 Nitrospira sp.; AJ224042  
 S000005124 Nitrospira moscoviensis (T); X82558  
 S000009675 Nitrospira sp.; Y14644  
 S000012390 Nitrospira sp.; AJ224039  
 S000024494 Nitrospira sp.; AJ224044  
 S000025371 uncultured bacterium 1405-19; AJ007652  
 S000025716 uncultured bacterium 1404-16; AJ007648  
 S000040958 rhizosphere soil bacterium RSC-II-52; AJ252684  
 S000106404 uncultured Nitrospirae bacterium; JG36-TzT-13; AJ534638  
 S000131017 uncultured bacterium; C3-K5; AJ421201  
 S000140627 uncultured soil bacterium; 1164-1; AY326515  
 S000140948 uncultured soil bacterium; 1163-1; AY326514  
 S000144745 uncultured Nitrospira sp.; JG36-GS-2; AJ582041  
 S000251489 unidentified bacterium; Neu4P3-38; AJ518433  
 S000252064 unidentified bacterium; Neu4P1-67; AJ518386  
 S000252632 unidentified bacterium; Mul2P1-48; AJ518201  
 S000261709 uncultured soil bacterium; 605; AY493909  
 S000262278 uncultured soil bacterium; 1183; AY493911  
 S000262850 uncultured soil bacterium; 339; AY493910  
 S000273576 uncultured bacterium; 1013-28-CG50; AY532585  
 S000331342 uncultured bacterium; Kazan-1B-07/BC19-1B-07; AY592084  
 S000338023 uncultured soil bacterium S004; AF128670  
 S000341118 uncultured Green Bay ferromanganous micronodule bacterium MNC2; AF293010  
 \* S000341120 uncultured Green Bay ferromanganous micronodule bacterium MNF8; AF293012  
 \* S000341121 uncultured Green Bay ferromanganous micronodule bacterium MNA3; AF293013  
 S000341786 unidentified bacterium wb1\_C02; AF317758  
 S000342310 uncultured bacterium; LCo23; AF337199  
 S000342509 uncultured Nitrospira sp.; 4-11; AF351228  
 \* S000351038 uncultured bacterium; JCL9-22; AF499363  
 \* S000351107 uncultured bacterium; BL-59; AF499432  
 S000351613 uncultured bacterium; C6-K31; AJ421160  
 S000353360 uncultured soil bacterium; S085; AY037608  
 S000353368 uncultured soil bacterium; S096; AY037616  
 S000357855 uncultured bacterium; DSSD16; AY328715  
 S000357883 uncultured bacterium; DSSD45; AY328743  
 S000357900 uncultured bacterium; DSSD62; AY328760  
 S000366366 uncultured Nitrospirae bacterium; DGGE gel band ESR BR 14; AF540049  
 S000366371 uncultured Nitrospirae bacterium; DGGE gel band ESR BR 19; AF540054  
 S000388268 Nitrospira cf. moscoviensis SBR1015; AF155152  
 S000388269 Nitrospira cf. moscoviensis SBR1024; AF155153  
 S000388271 Nitrospira cf. moscoviensis SBR2046; AF155155  
 S000402935 uncultured bacterium; CCU23; AY221079  
 S000471700 uncultured bacterium; D02307; AJ617917  
 S000471701 uncultured bacterium; D023010; AJ617918  
 S000471702 uncultured bacterium; D14423; AJ617919  
 S000471703 uncultured bacterium; D023011; AJ617920  
 S000492977 uncultured Nitrospirae bacterium; AKYG586; AY921743  
 S000492978 uncultured Nitrospirae bacterium; AKYG1809; AY921744  
 \* S000514101 uncultured Arthrobacter sp.; 24; AY942952  
 S000514160 uncultured bacterium; 37; AY943011  
 \* S000514190 uncultured Arthrobacter sp.; 24; AY943041  
 S000535842 uncultured Nitrospira sp.; Nsp2; AY876618  
 S000535843 uncultured Nitrospira sp.; Nsp9; AY876619  
 S000535844 uncultured Nitrospira sp.; Nsp11; AY876620  
 S000535845 uncultured Nitrospira sp.; Nsp1; AY876621  
 S000535846 uncultured Nitrospira sp.; Nsp27; AY876622

Lineage (click node to return it to hierarchy view):

Root (119/3333501); Bacteria (119/3070243); Nitrospirae (107/8171); "Nitrospira" (107/8171); "Nitrospirales" (107/8171); "Nitrospiraceae" (107/8171)

Hierarchy View:

▼ genus Nitrospira (107/5378) (hits/total searched) [list results for this node]

S000001332 Nitrospira sp.; Y14640  
 S000004359 Nitrospira sp.; Y14642  
 S000006640 Nitrospira sp.; Y14636  
 S000007351 Nitrospira sp.; Y14641  
 S000008534 Nitrospira sp.; AJ224041  
 S000010052 Nitrospira sp.; Y14637  
 S000010421 Nitrospira sp.; AJ224038  
 S000010844 Nitrospira sp.; Y14638  
 S000015738 Nitrospira sp.; Y14643  
 S000021615 Nitrospira sp.; Y14639  
 S000024499 Nitrospira sp.; AJ224043  
 S000024623 Nitrospira sp.; AJ224045  
 S000024748 Nitrospira sp.; AJ224046  
 S000336675 uncultured bacterium A-11; AF033558  
 S000336676 uncultured bacterium A-4; AF033559  
 S000341501 uncultured bacterium PHOS-HE34; AF314422  
 S000348943 uncultured bacterium; POB; AF440288  
 S000388270 Nitrospira cf. moscoviensis SBR2016; AF155154  
 S000425892 uncultured Nitrospira sp.; AY741094  
 S000537353 Candidatus Nitrospira defluvii; DQ059545  
 S000607302 uncultured bacterium; P3-N36; AB239557  
 S000607308 uncultured bacterium; Bu-N20; AB239563  
 S000607310 uncultured bacterium; Bu-N36; AB239565  
 S000656862 uncultured bacterium; AP19; AY921494  
 S000662948 uncultured bacterium; 71; DQ413129  
 S000668031 uncultured Nitrospira sp.; C4; DQ458783  
 S000686334 uncultured bacterium; C4; DQ499976  
 S000702219 uncultured Nitrospirae bacterium; 73; AB252941  
 S000702220 uncultured Nitrospirae bacterium; 369; AB252942  
 S000702221 uncultured Nitrospirae bacterium; 330; AB252943  
 S000702222 uncultured Nitrospirae bacterium; 406; AB252944  
 S000720826 uncultured Nitrospira sp.; BF9; DQ839324  
 S000749462 uncultured bacterium; IS-3; EF095013  
 S000862151 uncultured Nitrospirae bacterium; Skagenf5; DQ640657  
 S001030603 Candidatus Nitrospira defluvii; Contig5882; EU559167  
 S001158011 uncultured bacterium; N1903\_93; EU104347  
 S001224556 uncultured bacterium; FHINOA38/1-7682; FJ430192  
 S001294794 uncultured bacterium; TSBAR001\_C14; AB486070  
 \* S001318824 uncultured bacterium; B16; FJ660506  
 S001318828 uncultured bacterium; B21; FJ660510  
 S001318830 uncultured bacterium; B23; FJ660512  
 \* S001318832 uncultured bacterium; B25; FJ660514  
 S001318833 uncultured bacterium; B26; FJ660515  
 \* S001318921 uncultured bacterium; A208; FJ660604  
 S001353272 uncultured Nitrospira sp.; NSPI-2; AB500063  
 S001585993 uncultured bacterium; Kis08\_048; GQ385296  
 S001614188 uncultured bacterium; K26C1-29; AB504576  
 S001614233 uncultured bacterium; K29J2-18; AB504621  
 S001614262 uncultured bacterium; K29C2-17; AB504650  
 S001614275 uncultured bacterium; K29G2-3; AB504663  
 S001614287 uncultured bacterium; K29G2-21; AB504675  
 \* S001683724 uncultured bacterium; T1-102; GQ487925  
 \* S001683728 uncultured bacterium; T1-126; GQ487929  
 S001683795 uncultured bacterium; V8-58; GQ487996  
 S001752975 uncultured bacterium; MFC\_32E10; FJ624177  
 S001938902 uncultured bacterium; ambient\_uncontrolled-12; GU454873  
 S001938972 uncultured bacterium; ambient\_uncontrolled-82; GU454943  
 S002222769 Candidatus Nitrospira defluvii; FP929003  
 S002289961 Candidatus Nitrospira defluvii; FP929003  
 S002303062 uncultured bacterium; 147; HQ538637  
 S002337126 uncultured bacterium; F\_SBR\_72; HQ010847  
 S002373993 uncultured bacterium; T35; HMQ07548  
 S002437234 uncultured bacterium; Anxy8; HQ343213  
 S002495762 uncultured Nitrospirae bacterium; LJ-B96; JF319184  
 S002502514 uncultured bacterium; T1-28; JF502873

Lineage (click node to return it to hierarchy view):

Root (167/3333501) ; Bacteria (167/3070243) ; "Proteobacteria" (136/1031919) ; Alphaproteobacteria (136/254486) ; Rhizobiales (136/84204) ; Bradyrhizobiaceae (135/13197)

Hierarchy View:

▼ genus Nitrobacter (107/195) (hits/total searched) [list results for this node]

\* S000265885 Nitrobacter sp. PBAB10; AY508475  
 \* S000269985 Nitrobacter sp. PBAB17; AY508476  
 S000414380 Nitrobacter winogradskyi; W; L11661  
 S000414381 Nitrobacter sp.; LL; L11662  
 S000414382 Nitrobacter hamburgensis (T); X14; L11663  
 S000414627 Nitrobacter hamburgensis; Nb14; L35502  
 S000414631 Nitrobacter winogradskyi; L35506  
 S000414636 Nitrobacter sp.; R6; L35511  
 S000428396 Nitrobacter alkalicus (T); AN1; AF069956  
 S000428397 Nitrobacter alkalicus; AN2; AF069957  
 S000428398 Nitrobacter alkalicus; AN4; AF069958  
 S000428549 Nitrobacter sp. TH21; AF080257  
 \* S000434952 Nitrobacter sp. KB215; AY055794  
 S000434953 Nitrobacter sp. PJN1; AY055795  
 S000434955 Nitrobacter sp. NRB5220; AY055797  
 S000487444 uncultured Rhizobiales bacterium; JAB 5HC 117; AY694549  
 S000492976 uncultured alpha proteobacterium; AKYH732; AY921742  
 S000535828 uncultured Nitrobacter sp.; Nbac20; AY876604  
 S000535829 uncultured Nitrobacter sp.; Nbac20-3-12s; AY876605  
 S000535831 uncultured Nitrobacter sp.; Nbac20-4o14; AY876607  
 S000535832 uncultured Nitrobacter sp.; Nbac3-2; AY876608  
 S000535833 uncultured Nitrobacter sp.; Nbac3-2-4o12; AY876609  
 S000535841 uncultured Nitrobacter sp.; Nbac21; AY876617  
 S000568817 uncultured bacterium; UTF5\_N\_MP\_RUN7\_25; AB200974  
 S000608915 Nitrobacter vulgaris (T); type strain: DSM 10236; AM114522  
 S000770488 uncultured bacterium; PnDHS-18; AB290707  
 S000858444 Nitrobacter winogradskyi; Engel; AM286374  
 S000858446 Nitrobacter sp. Nato; AM286376  
 S000858447 Nitrobacter winogradskyi; F83KO; AM286377  
 S000858448 Nitrobacter vulgaris; 339; AM286378  
 S000858449 Nitrobacter sp. GT oman; AM286379  
 S000858450 Nitrobacter vulgaris; AB1; AM286380  
 S000858451 Nitrobacter vulgaris; K48; AM286381  
 S000858452 Nitrobacter vulgaris; K55; AM286382  
 S000858454 Nitrobacter sp. 5F/3; AM286384  
 S000858455 Nitrobacter sp. LIP; AM286385  
 S000858456 Nitrobacter sp. 4111/1; AM286386  
 S000858458 Nitrobacter sp. AB3; AM286388  
 S000858459 Nitrobacter winogradskyi; R1.30; AM286389  
 S000858460 Nitrobacter vulgaris; 329; AM286390  
 S000858461 Nitrobacter sp. Termite2; AM286391  
 S000858462 Nitrobacter sp. Yukatan; AM286392  
 S000858463 Nitrobacter vulgaris; C2; AM286393  
 S000858464 Nitrobacter sp. D6/13; AM286394  
 S000858465 Nitrobacter sp. lo acid; AM286395  
 S000858466 Nitrobacter hamburgensis; Y; AM286396  
 S000858467 Nitrobacter sp. 311; AM286397  
 S000858468 Nitrobacter vulgaris; BB3; AM286398  
 S000901726 Nitrobacter winogradskyi; Engel; AM292277  
 S000901728 Nitrobacter sp. Nato; AM292279



## Lineage (click node to return it to hierarchy view):

Root (153/3333501) ; Bacteria (153/3070243) ; "Proteobacteria" (153/1031919) ; Alphaproteobacteria (151/254486) ; Rhizobiales (151/84204) ; Bradyrhizobiaceae (148/13197)

## Hierarchy View:

▼ genus Nitrobacter (117/195) (hits/total searched) [[list results for this node]

\* S000265885 Nitrobacter sp. PBAB10; AY508475  
 \* S000269985 Nitrobacter sp. PBAB17; AY508476  
 \* S000392359 Nitrobacter winogradskyi; IFO 14297; AF363288  
 S000397176 nitrite-oxidizing bacterium MPN2; AY135357  
 S000414380 Nitrobacter winogradskyi; W; L11661  
 S000414381 Nitrobacter sp.; LL; L11662  
 S000414382 Nitrobacter hamburgensis (T); X14; L11663  
 S000414627 Nitrobacter hamburgensis; Nb14; L35502  
 S000414631 Nitrobacter winogradskyi; L35506  
 S000414632 Nitrobacter winogradskyi; L35507  
 S000414636 Nitrobacter sp.; R6; L35511  
 S000428396 Nitrobacter alkalicus (T); AN1; AF069956  
 S000428397 Nitrobacter alkalicus; AN2; AF069957  
 S000428398 Nitrobacter alkalicus; AN4; AF069958  
 S000428549 Nitrobacter sp. TH21; AF080257  
 S000434953 Nitrobacter sp. PJN1; AY055795  
 S000434954 Nitrobacter winogradskyi; ATCC 14123; AY055796  
 S000434955 Nitrobacter sp. NRB5220; AY055797  
 S000487300 uncultured Nitrobacter sp.; 1; AY683484  
 S000487444 uncultured Rhizobiales bacterium; JAB SHC 117; AY694549  
 S000492976 uncultured alpha proteobacterium; AKYH732; AY921742  
 S000535828 uncultured Nitrobacter sp.; Nbac20; AY876604  
 S000535829 uncultured Nitrobacter sp.; Nbac20-3-12; AY876605  
 S000535831 uncultured Nitrobacter sp.; Nbac20-4o14; AY876607  
 S000535832 uncultured Nitrobacter sp.; Nbac3-2; AY876608  
 S000535833 uncultured Nitrobacter sp.; Nbac3-2-4o12; AY876609  
 S000535841 uncultured Nitrobacter sp.; Nbac21; AY876617  
 S000568817 uncultured bacterium; UTF5\_N\_MP\_RUN7\_25; AB200974  
 S000608915 Nitrobacter vulgaris (T); type strain: DSM 10236; AM114522  
 S000770488 uncultured bacterium; PnDHS-18; AB290707  
 S000858444 Nitrobacter winogradskyi; Engel; AM286374  
 S000858446 Nitrobacter sp. Nato; AM286376  
 S000858447 Nitrobacter winogradskyi; F83KO; AM286377  
 S000858448 Nitrobacter vulgaris; 339; AM286378  
 S000858449 Nitrobacter sp. GT oman; AM286379  
 S000858450 Nitrobacter vulgaris; AB1; AM286380  
 S000858451 Nitrobacter vulgaris; K48; AM286381  
 S000858452 Nitrobacter vulgaris; K55; AM286382  
 S000858454 Nitrobacter sp. 5F/3; AM286384  
 S000858455 Nitrobacter sp. LIP; AM286385  
 S000858456 Nitrobacter sp. 4111/1; AM286386  
 S000858458 Nitrobacter sp. AB3; AM286388  
 S000858459 Nitrobacter winogradskyi; R1.30; AM286389  
 S000858460 Nitrobacter vulgaris; 329; AM286390  
 S000858461 Nitrobacter sp. Termite2; AM286391  
 S000858462 Nitrobacter sp. Yukatan; AM286392  
 S000858463 Nitrobacter vulgaris; C2; AM286393  
 S000858464 Nitrobacter sp. D6/13; AM286394  
 S000858465 Nitrobacter sp. lo acid; AM286395  
 S000858466 Nitrobacter hamburgensis; Y; AM286396

Lineage (*click node to return it to hierarchy view*):

Root (437/3333501) ; Bacteria (437/3070243) ; "Proteobacteria" (432/1031919) ; Betaproteobacteria (430/217518) ; Nitrosomonadales (379/7530)

Hierarchy View:

family Nitrosomonadaceae (379/7522) (hits/total searched) [[list results for this node](#)]

▶ genus *Nitrosomonas* (49/911)

▶ genus *Nitrosospira* (37/5714)

▶ unclassified\_Nitrosomonadaceae (293/897)

Lineage (click node to return it to hierarchy view):

Root (198344/3333501); Bacteria (198344/3070243); "Proteobacteria" (184478/1031919); Betaproteobacteria (67027/217518)

Hierarchy View:

order Nitrosomonadales (1749/7530) (hits/total searched) [list results for this node]  
 family Nitrosomonadaceae (1749/7522)  
 ▶ genus Nitrosomonas (118/911)  
 ▶ genus Nitrosospira (1058/5714)  
 ▶ unclassified\_Nitrosomonadaceae (573/897)  
 family Spirillaceae (0/7)  
 unclassified\_Nitrosomonadales (0/1)

\* NmoCL6b is not very specific and is likely to be targeting other non-AOB targets present in the wastewater ecosystem

## Non-specific targets

Hierarchy View:

rootrank Root (198344/3333501) (hits/total searched) [list results for this node]  
 domain Bacteria (198344/3070243)  
 phylum "Actinobacteria" (154/349461)  
 phylum "Aquificae" (5/2085)  
 phylum "Bacteroidetes" (12050/388464)  
 phylum "Caldiserica" (0/361)  
 phylum "Chlamydiae" (0/1538)  
 phylum "Chlorobi" (0/1556)  
 phylum "Chloroflexi" (73/42562)  
 phylum "Chrysiogenetes" (0/13)  
 phylum "Deferribacteres" (0/1462)  
 phylum "Deinococcus-Thermus" (0/5035)  
 phylum "Dictyoglomi" (0/71)  
 phylum "Elusimicrobia" (37/782)  
 phylum "Fibrobacteres" (0/1863)  
 phylum "Fusobacteria" (1/17964)  
 phylum "Gemmatimonadetes" (1/5338)  
 phylum "Lentisphaerae" (0/2628)  
 phylum Nitrospirae (2/8171)  
 phylum "Planctomycetes" (8/31651)  
 phylum "Proteobacteria" (184478/1031919)  
 phylum "Spirochaetes" (0/30375)  
 phylum "Synergistetes" (2/2996)  
 phylum "Tenericutes" (0/10618)  
 phylum "Thermodesulfobacteria" (0/249)  
 phylum "Thermotogae" (14/1199)  
 phylum BRC1 (0/628)  
 phylum Parcubacteria (0/942)  
 phylum Microgenomates (0/322)  
 phylum SR1 (6/1084)  
 phylum Candidatus Saccharibacteria (1/7052)  
 phylum Latescibacteria (0/1162)  
 phylum "Armatimonadetes" (1/3243)  
 phylum "Verrucomicrobia" (13/27439)  
 phylum "Acidobacteria" (576/74631)  
 phylum Firmicutes (99/811625)  
 phylum Cyanobacteria/Chloroplast (11/70404)  
 phylum Marinimicrobia (3/1637)  
 phylum Aminicenantes (0/2296)  
 phylum Omnitrophica (0/38)  
 phylum Acetothermia (0/89)  
 phylum Poribacteria (0/354)  
 phylum Atribacteria (0/168)  
 phylum Cloacimonetes (1/11224)  
 phylum Candidatus Calesciantes (0/5)  
 phylum candidate division WPS-1 (110/1224)  
 phylum candidate division WPS-2 (0/376)  
 phylum Hydrogenedentes (51/985)  
 phylum candidate division ZB3 (0/95)  
 phylum Ignavibacteriae (0/2130)  
 phylum Nitrospinae (0/821)  
 Archaea Outgroup (0/1)  
 ▶ unclassified\_Bacteria (647/111907)  
 domain Archaea (0/154357)  
 domain Fungi (0/108901)  
 unclassified\_Root (0/0)

## Lineage (click node to return it to hierarchy view):

Root (1398/3333501) ; Bacteria (1398/3070243) ; "Proteobacteria" (1394/1031919) ; Betaproteobacteria (1387/217518)

## Hierarchy View:

order Nitrosomonadales (1295/7530) (hits/total searched) [list results for this node]  
  family Nitrosomonadaceae (1291/7522)  
    ▶ genus Nitrosomonas (248/911)  
    ▶ genus Nitrospira (993/5714)  
    ▶ unclassified\_Nitrosomonadaceae (50/897)  
  family Spirillaceae (4/7)  
    ▶ genus Spirillum (4/7)  
    unclassified\_Spirillaceae (0/0)  
  unclassified\_Nitrosomonadales (0/1)



Lineage (click node to return it to hierarchy view):

Root (1472/3333501); Bacteria (1472/3070243); "Proteobacteria" (1468/1031919); Betaproteobacteria (1465/217518); Nitrosomonadales (391/7530)

Hierarchy View:

family Nitrosomonadaceae (391/7522) (hits/total searched) [list results for this node]  
 ▶ genus Nitrosomonas (17/911)  
 ▶ genus Nitrosospira (53/5714)  
 ▶ unclassified\_Nitrosomonadaceae (321/897)

## Non-specific targets

Lineage (click node to return it to hierarchy view):

Root (1472/3333501); Bacteria (1472/3070243)

Hierarchy View:

phylum "Proteobacteria" (1468/1031919) (hits/total searched) [list results for this node]  
 class Alphaproteobacteria (0/254486)  
 class **Betaproteobacteria** (1465/217518)  
 order Burkholderiales (1004/143334)  
 family Alcaligenaceae (0/10811)  
 family Burkholderiaceae (0/30570)  
 family Comamonadaceae (1/55256)  
 family Oxalobacteraceae (996/22528)  
 family Sutterellaceae (0/3312)  
 family Burkholderiales\_incertae\_sedis (1/14036)  
 ▶ unclassified\_Burkholderiales (6/6821)  
 order Hydrogenophilales (1/2527)  
 family Hydrogenophilaceae (1/2527)  
 unclassified\_Hydrogenophilales (0/0)  
 order Methylophilales (0/6132)  
 order Neisseriales (0/20136)  
 order Nitrosomonadales (391/7530)  
 family Nitrosomonadaceae (391/7522)  
 family Spirillaceae (0/7)  
 unclassified\_Nitrosomonadales (0/1)  
 order "Procabacteriales" (0/15)  
 order Rhodocyclales (1/14919)  
 family Rhodocyclaceae (1/14919)  
 unclassified\_Rhodocyclales (0/0)  
 order Gallionellales (0/2444)  
 order Ferroales (0/1301)  
 order Ferritrophicales (0/220)  
 genus Chitinivorax (0/26)  
 ▶ unclassified\_Betaproteobacteria (68/18934)  
 class Deltaproteobacteria (0/83856)  
 class Epsilonproteobacteria (0/21128)  
 class Gammaproteobacteria (0/440369)  
 class "Zetaproteobacteria" (0/579)  
 ▶ unclassified\_"Proteobacteria" (3/13983)

\* Nmo218 is not very specific but the undesired targets (e.g. Oxalobacteraceae) were not detected by amplicon sequencing to be present in the samples tested in this study.

Nse1472

5'-ACC CCA GTC ATG ACC CCC -3'

Lineage (click node to return it to hierarchy view):

Root (215/3333501); Bacteria (215/3070243); "Proteobacteria" (213/1031919); Betaproteobacteria (211/217518)

Hierarchy View:

order Nitrosomonadales (209/7530) (hits/total searched) [list results for this node]  
family Nitrosomonadaceae (209/7522)  
▶ genus Nitrosomonas (208/911)  
genus Nitrospira (0/5714)  
▶ unclassified\_Nitrosomonadaceae (1/897)  
family Spirillaceae (0/7)  
unclassified\_Nitrosomonadales (0/1)

Nsv443

5'-CCGTGACCGTTTCGTTCCGGC -3'

Lineage (click node to return it to hierarchy view):

Root (945/3333501); Bacteria (945/3070243); "Proteobacteria" (944/1031919); Betaproteobacteria (940/217518)

Hierarchy View:

order Nitrosomonadales (934/7530) (hits/total searched) [list results for this node]  
family Nitrosomonadaceae (934/7522)  
genus Nitrosomonas (0/911)  
▶ genus Nitrospira (934/5714)  
unclassified\_Nitrosomonadaceae (0/897)  
family Spirillaceae (0/7)  
unclassified\_Nitrosomonadales (0/1)

# Primer coverage for universal primers used in HOPE to detect for total bacteria

| 27F                         | To be used as primer!                                                                                                                                                                                                                                                                                                                   |
|-----------------------------|-----------------------------------------------------------------------------------------------------------------------------------------------------------------------------------------------------------------------------------------------------------------------------------------------------------------------------------------|
| Accession no.               | pB-03784                                                                                                                                                                                                                                                                                                                                |
| Name<br>(Alm et al., 1996)* | S-D-Bact-0008-d-S-20                                                                                                                                                                                                                                                                                                                    |
| Specificity                 | Bacteria                                                                                                                                                                                                                                                                                                                                |
| Check specificity           |     |
| Evaluate primer pair        | Select 2nd primer <input type="text" value="S*-Univ-0517-a-A-15, Uni522R"/><br><input type="button" value="Evaluate using SILVA TestPrime"/>                                                                                                                                                                                            |
| Probe category              | ► primer                                                                                                                                                                                                                                                                                                                                |
| Target molecule             | 16S rRNA                                                                                                                                                                                                                                                                                                                                |
| Position*                   | 6 - 25                                                                                                                                                                                                                                                                                                                                  |
| Direction                   | forward primer                                                                                                                                                                                                                                                                                                                          |
| Sequence*                   | 5' - AGA GTT TGA TCM TGG CTC AG -3'                                                                                                                                                                                                                                                                                                     |
| Length [nt]                 | 20                                                                                                                                                                                                                                                                                                                                      |
| MW [g/mol]                  | 5854                                                                                                                                                                                                                                                                                                                                    |
| G+C content [%]             | 45                                                                                                                                                                                                                                                                                                                                      |
| Tm [°C]*                    | 51                                                                                                                                                                                                                                                                                                                                      |
| Coverage<br>(full match)*   | Archaea: 0 %<br>Bacteria: 81.8 %<br>Eukaryotes: 0 %                                                                                                                                                                                                                                                                                     |
| Coverage<br>(1 mismatch)*   | Archaea: 0 %<br>Bacteria: 91.4 %<br>Eukaryotes: 0 %                                                                                                                                                                                                                                                                                     |
| Reference                   | Hongoh Y, Ohkuma M, Kudo T. Molecular analysis of bacterial microbiota in the gut of the termite <i>reticulitermes speratus</i> (isoptera: rhinotermitidae). <i>FEMS Microbiol. Ecol.</i> 44, 231-242 (2003).<br>► <a href="#">Abstract (PUBMED)</a>                                                                                    |

| EUB338<br>(Bact338)<br>(bacterial) | Tested for in situ hybridization.                                                                                                                                                                                                                                                                                                               |
|------------------------------------|-------------------------------------------------------------------------------------------------------------------------------------------------------------------------------------------------------------------------------------------------------------------------------------------------------------------------------------------------|
| Accession no.                      | pB-00159                                                                                                                                                                                                                                                                                                                                        |
| Name<br>(Alm et al., 1996)*        | S-D-Bact-0338-a-A-18                                                                                                                                                                                                                                                                                                                            |
| Specificity                        | most Bacteria<br>Coverage/hits target group: 90% / 169389<br>(domain Bacteria )<br>Hits non-target groups: 0                                                                                                                                                                                                                                    |
| Check specificity                  |     |
| Probe category                     | ► higher taxonomic levels                                                                                                                                                                                                                                                                                                                       |
| Target molecule                    | 16S rRNA                                                                                                                                                                                                                                                                                                                                        |
| Position*                          | 338 - 355                                                                                                                                                                                                                                                                                                                                       |
| Sequence*                          | 5' - GCT GCC TCC CGT AGG AGT -3'                                                                                                                                                                                                                                                                                                                |
| Length [nt]                        | 18                                                                                                                                                                                                                                                                                                                                              |
| MW [g/mol]                         | 5487                                                                                                                                                                                                                                                                                                                                            |
| G+C content [%]                    | 66.7                                                                                                                                                                                                                                                                                                                                            |
| Tm [°C]*                           | 55                                                                                                                                                                                                                                                                                                                                              |
| delta Gs<br>[kcal/mol]*            | $\Delta G_1$ : -24.86; $\Delta G_2$ : -1.59; $\Delta G_{12}$ : -23.22                                                                                                                                                                                                                                                                           |
| Formamide [%]*                     | 0-50                                                                                                                                                                                                                                                                                                                                            |
| Reference                          | Amann R. I., Binder B. J., Olson R. J., Chisholm S. W., Devereux R. and Stahl D. A. (1990). Combination of 16S rRNA-targeted oligonucleotide probes with flow cytometry for analyzing mixed microbial populations. <i>Appl. Environ. Microbiol.</i> 56: 1919-1925.<br>► <a href="#">Abstract (PUBMED)</a>                                       |

# Primer coverage for universal primers used in amplicon sequencing to detect for total bacteria

| U515F                       | To be used as primer!                                                                                                                                                                                                                                                                                                                   |
|-----------------------------|-----------------------------------------------------------------------------------------------------------------------------------------------------------------------------------------------------------------------------------------------------------------------------------------------------------------------------------------|
| Accession no.               | pB-03751                                                                                                                                                                                                                                                                                                                                |
| Name<br>(Alm et al., 1996)* | S-*-Univ-0515-a-S-19                                                                                                                                                                                                                                                                                                                    |
| Specificity                 | Bacteria, Archaea, Eukarya                                                                                                                                                                                                                                                                                                              |
| Check specificity           |     |
| Evaluate primer pair        | Select 2nd primer <input type="text" value="S-*-Univ-0517-a-A-15, Uni522R"/><br><input type="text" value="Evaluate using SILVA TestPrime"/>                                                                                                                                                                                             |
| Probe category              | ► primer                                                                                                                                                                                                                                                                                                                                |
| Target molecule             | 16S rRNA                                                                                                                                                                                                                                                                                                                                |
| Position*                   | 515 - 533                                                                                                                                                                                                                                                                                                                               |
| Direction                   | forward primer                                                                                                                                                                                                                                                                                                                          |
| Sequence*                   | 5' - GTG CCA GCM GCC GCG GTA A -3'                                                                                                                                                                                                                                                                                                      |
| Length [nt]                 | 19                                                                                                                                                                                                                                                                                                                                      |
| MW [g/mol]                  | 5520                                                                                                                                                                                                                                                                                                                                    |
| G+C content [%]             | 68.4                                                                                                                                                                                                                                                                                                                                    |
| Tm [°C]*                    | 59                                                                                                                                                                                                                                                                                                                                      |
| Coverage<br>(full match)*   | Archaea: 54.5 %<br>Bacteria: 95.4 %<br>Eukaryotes: 92.2 %                                                                                                                                                                                                                                                                               |
| Coverage<br>(1 mismatch)*   | Archaea: 96.2 %<br>Bacteria: 98.4 %<br>Eukaryotes: 97 %                                                                                                                                                                                                                                                                                 |
| Reference                   | Walters WA, Caporaso JG, Lauber CL, Berg-Lyons D, Fierer N, Knight R. PrimerProspector: de novo design and taxonomic analysis of barcoded PCR primers. <i>Bioinformatics</i> . 10.1093/bioinformatics/btr087 (2011).<br>► <a href="#">Abstract (PUBMED)</a>                                                                             |

| 907R                        | To be used as primer!                                                                                                                                                                                                                                                                                                                           |
|-----------------------------|-------------------------------------------------------------------------------------------------------------------------------------------------------------------------------------------------------------------------------------------------------------------------------------------------------------------------------------------------|
| Accession no.               | pB-03718                                                                                                                                                                                                                                                                                                                                        |
| Name<br>(Alm et al., 1996)* | S-D-Bact-0907-a-A-20                                                                                                                                                                                                                                                                                                                            |
| Specificity                 | Bacteria                                                                                                                                                                                                                                                                                                                                        |
| Check specificity           |     |
| Evaluate primer pair        | Select 2nd primer <input type="text" value="S-*-Univ-0341-b-S-17, U341F"/><br><input type="text" value="Evaluate using SILVA TestPrime"/>                                                                                                                                                                                                       |
| Probe category              | ► primer                                                                                                                                                                                                                                                                                                                                        |
| Target molecule             | 16S rRNA                                                                                                                                                                                                                                                                                                                                        |
| Position*                   | 907 - 926                                                                                                                                                                                                                                                                                                                                       |
| Direction                   | reverse primer                                                                                                                                                                                                                                                                                                                                  |
| Sequence*                   | 5' - CCG TCA ATT CMT TTG AGT TT -3'                                                                                                                                                                                                                                                                                                             |
| Length [nt]                 | 20                                                                                                                                                                                                                                                                                                                                              |
| MW [g/mol]                  | 5758                                                                                                                                                                                                                                                                                                                                            |
| G+C content [%]             | 35                                                                                                                                                                                                                                                                                                                                              |
| Tm [°C]*                    | 47                                                                                                                                                                                                                                                                                                                                              |
| Coverage<br>(full match)*   | Archaea: 0 %<br>Bacteria: 89.7 %<br>Eukaryotes: 0 %                                                                                                                                                                                                                                                                                             |
| Coverage<br>(1 mismatch)*   | Archaea: 0.9 %<br>Bacteria: 96.9 %<br>Eukaryotes: 77 %                                                                                                                                                                                                                                                                                          |
| Reference                   | Muyzer G, A, Teske C.O, Wirsén J, Jannasch H.W Phylogenetic relationships of <i>Thiomicrospira</i> species and their identification in deep-sea hydrothermal vent samples by denaturing gradient gel electrophoresis of 16S rDNA fragments. <i>Arch. Microbiol.</i> 164, 165-172 (1995).<br>► <a href="#">Abstract (PUBMED)</a>                 |

# Nitrifying bacterial populations detected by 515F and 907R primers

## Probe Match Result

Display depth:

Auto ▼

Differences

Allowed: 0 ▼

Probe: 5'TTACCGCGGCKGCTGRCAC 3'

Target: 5'GTGYCAGCMGCCGCGGTAA 3'

Probe: 5'CCCCGYCAATTCMTTTRAGT 3'

Target: 5'ACTYAAAKGAATTGRCGGGG 3'

[\[ start over | help | options \]](#)

Lineage (*click node to return it to hierarchy view*):

Root (1490490/3333501) ; Bacteria (1490490/3070243) ; "Proteobacteria" (483848/1031919) ; Betaproteobacteria (110367/217518)

Hierarchy View:

order Nitrosomonadales (4877/7530) (hits/total searched) [[list results for this node](#)]  
  family Nitrosomonadaceae (4873/7522)  
    ▶ genus Nitrosomonas (401/911)  
    ▶ genus Nitrospira (4038/5714)  
    ▶ unclassified\_Nitrosomonadaceae (434/897)  
  family Spirillaceae (3/7)  
    ▶ genus Spirillum (3/7)  
    unclassified\_Spirillaceae (0/0)  
  ▶ unclassified\_Nitrosomonadales (1/1)

Lineage (*click node to return it to hierarchy view*):

Root (1490490/3333501) ; Bacteria (1490490/3070243)

Hierarchy View:

phylum Nitrospirae (2505/8171) (hits/total searched) [[list results for this node](#)]  
  class "Nitrospira" (2505/8171)  
    order "Nitrospirales" (2505/8171)  
      family "Nitrospiraceae" (2505/8171)  
        ▶ genus Leptospirillum (558/2520)  
        ▶ genus Nitrospira (1832/5378)  
        ▶ genus Thermodesulfobivrio (87/230)  
        ▶ unclassified\_"Nitrospiraceae" (28/43)  
        unclassified\_"Nitrospirales" (0/0)  
      unclassified\_"Nitrospira" (0/0)  
    unclassified\_Nitrospirae (0/0)



# Nitrifying bacterial populations detected by 515F and 907R primers

## Probe Match Result

Display depth:

Auto

Differences

Allowed: 0

Probe: 5'TTACCGGGCKGCTGRCAC 3'

Target: 5'GTGYCAGCMGCCGCGGTAA 3'

Probe: 5'CCCCGYCAATTCMTTTRAGT 3'

Target: 5'ACTYAAAKGAATTGRCGGGG 3'

[\[ start over | help | options \]](#)

### Lineage (click node to return it to hierarchy view):

[Root](#) (1490490/3333501) ; [Bacteria](#) (1490490/3070243) ; ["Proteobacteria"](#) (483848/1031919) ; [Alphaproteobacteria](#) (109223/254486) ; [Rhizobiales](#) (37023/84204) ; [Bradyrhizobiaceae](#) (6309/13197)

### Hierarchy View:

▼ [genus Nitrobacter](#) (113/195) (hits/total searched) [[list results for this node](#)]

- \* [S000269985](#) Nitrobacter sp. PBAB17; AY508476
- \* [S000392359](#) Nitrobacter winogradskyi; IFO 14297; AF363288
  - [S000414380](#) Nitrobacter winogradskyi; W; L11661
  - [S000414381](#) Nitrobacter sp.; LL; L11662
  - [S000414382](#) Nitrobacter hamburgensis (T); X14; L11663
  - [S000414627](#) Nitrobacter hamburgensis; Nb14; L35502
  - [S000414631](#) Nitrobacter winogradskyi; L35506
  - [S000414632](#) Nitrobacter winogradskyi; L35507
  - [S000414636](#) Nitrobacter sp.; R6; L35511
  - [S000428396](#) Nitrobacter alkalicus (T); AN1; AF069956
  - [S000428397](#) Nitrobacter alkalicus; AN2; AF069957
  - [S000428398](#) Nitrobacter alkalicus; AN4; AF069958
  - [S000434954](#) Nitrobacter winogradskyi; ATCC 14123; AY055796
  - [S000434955](#) Nitrobacter sp. NRB5220; AY055797
  - [S000492976](#) uncultured alpha proteobacterium; AKYH732; AY921742
  - [S000535828](#) uncultured Nitrobacter sp.; Nbac20; AY876604
  - [S000535829](#) uncultured Nitrobacter sp.; Nbac20-3-12s; AY876605
